# Supplementary material for: Effect of BMP-2 Delivery Mode on Osteogenic Differentiation of Stem Cells
Source: Hindawi journal article supplement (doi:10.1155/2017/7859184), 2017-01-01
Supplement: f1 [file 7859184.f1.pdf]

## Supplementary Figure 1

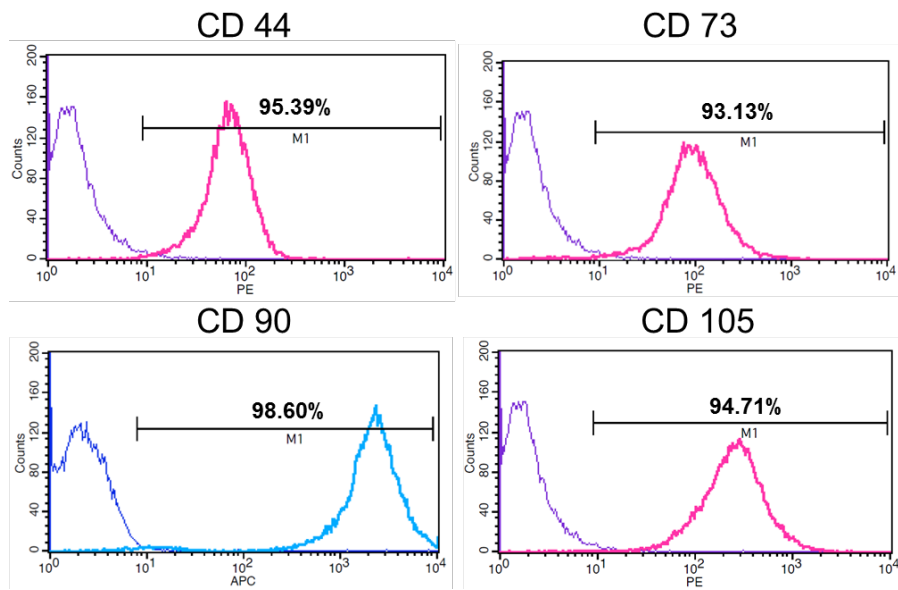

**Supplementary Figure 1.** Characterization of BM-MSCs at passage 5 by flow cytometry histograms.

## Supplementary Figure 2

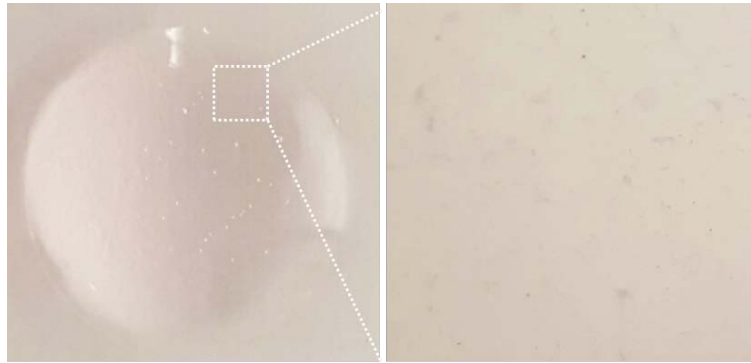

**Supplementary Figure 2.** The photographs of an ALP stained human BM-MSCs cultured on RGD-modified alginate without BMP-2.
